# Supplementary material
Source: PubMed Central journal article supplement (PMC6558248)
Supplement: EMS83062-supplement-Supplementary_figures.pdf [file EMS83062-supplement-Supplementary_figures.pdf]

**Supplemental Data**

**Supplemental Table 1: Conservation table for the 119<sup>th</sup> fibronectin 3 domain of *TTN***

| Species   | Reference sequence   | Amino acid sequence                                                                              |
|-----------|----------------------|--------------------------------------------------------------------------------------------------|
| Human     | CAD12456.1           | PGPCGKLTVSR VTQEKCTLAWSLPQEDGGAEITHY IVERRETSRLNWWIVEGECPTLSYVVTRLIKNEYIFRVRAVNKYGPGVPVESEPIVA   |
| Chimp     | ENSPTRP00000021693   | PGPCGKLTVSR VTQEKCTLAWSLPQEDGGAEITHY IVERRETSRLNWWIVEGECPTLSY KRLIINNEYIFRVRAVNKYGPGVPVESQPIVA   |
| Mouse     | ENSMUSP00000107477.2 | PGPCGKLTVSR VTEEKCTLAWSLPQEDGGAEITHY IVERRETSRLNWWIVEGECPTLSYVVTRLIKNEYTFRVRAVNKYGLGVPVESEPIVA   |
| Cow       | ENSBTAP00000053669   | PGPCGKLTVSR VTEEKCTLAWSLPQEDGGAEITHY IVERRETSRLNWWIVEGECPTLSHVVTRLIKNEYIFRVRAVNKYGPGVPVESEPIVA   |
| Dog       | ENSCAFP00000020728   | PGPCGKLTVSR ITEEKCTLAWSLPQEDGGAEITHY IVERRETSRLNWWIVEAECPTLSYVVTRLIKNEYIFRVRAVNKYGPGVPVESEPIVA   |
| T devil   | XP_003764065.1       | PGPCGKLMISR VTEEKCTLAWTLPQEDGGAEITHY IVERRETSRLNWWIVEGECPTLSHVVTRLIKNEYIFRVRAVNKYGPGVPVESEPIIA   |
| Rabbit    | ENSOCUP00000014521   | PGPCGKLTVSR VTEEKCTLAWSLPQEDGGAEITHY IVERRETSRLNWWIVEGECPTLSYVVTRLIKNEYIFRVRAVNKYGPGVPVESEPIVA   |
| Rat       | XP_575155.4          | PGPPGGPIEFKTVTAEKITLLWRPQADGGAKITHY IVEKRETSRVVWSMVAENLEECIITTTKI IKGNEYIFRVRAVNKYGIGEPLESEPVVA  |
| Zebrafish | ENSDARP00000019957   | PGPCQEITVSN VSEEKCTVSWKVPQEDGGDPITHY IVERRDTNRLNWWIMEAECKALTCEIRRLFKNNEYIFRVRGVNVKYGPGVLVQSNPIFA |

Figure legend: The corresponding positions to the human sequence for the mutations are indicated at p.30071 (blue), p.30091 (green), and p.30145 (yellow)

**Supplemental Table 2: Novel coding variants in *TTN* from 239 exomes performed at our center**

| <b>Domain</b>          | <b>n aa</b>  | <b>% aa</b> | <b>n variants</b> | <b>% variants</b> |
|------------------------|--------------|-------------|-------------------|-------------------|
| Z-DISC (1-1605)        | 1605         | 4.7         | 6                 | 8.5               |
| I-BAND (1606-14015)    | 12410        | 36.1        | 20                | 28.2              |
| A-BAND (14016-31948)   | 17933        | 52.2        | 35                | 49.3              |
| KINASE (31949-33817)   | 1869         | 5.4         | 7                 | 9.9               |
| M-LINE (33818-34350)   | 533          | 1.6         | 3                 | 4.2               |
| <b>TOTAL (1-34350)</b> | <b>34350</b> | <b>100</b>  | <b>71</b>         | <b>100</b>        |

Table legend: Parentheses in domain indicate the amino acid positions which constitute that domain, using CAD12456.1 as the reference sequence, and referring to domains outlined in Kontrogianni-Konstantopoulos A et al, Muscle giants: molecular scaffolds in sarcomerogenesis. *Physiol Rev* 89: 1217–1267, 2009 and Granzier and Labeit, Titin and its associated proteins, p. 88-119 in Squire JM and Parry DAD, Fibrous proteins: muscle and molecular motors. *Advances in Protein Chemistry and Structural Biology* Vol 71. Academic Press 2005. ISBN: 9780120342716

domain=the region of the titin gene of interest

n aa=number of amino acids in that domain

% aa=percentage of amino acids in this domain vs the length of the whole titin protein

n variants=number of novel sequence variants in that domain

% variants=percentage of novel sequence variants in that domain compared with all the novel titin variants

## Supplemental Figure

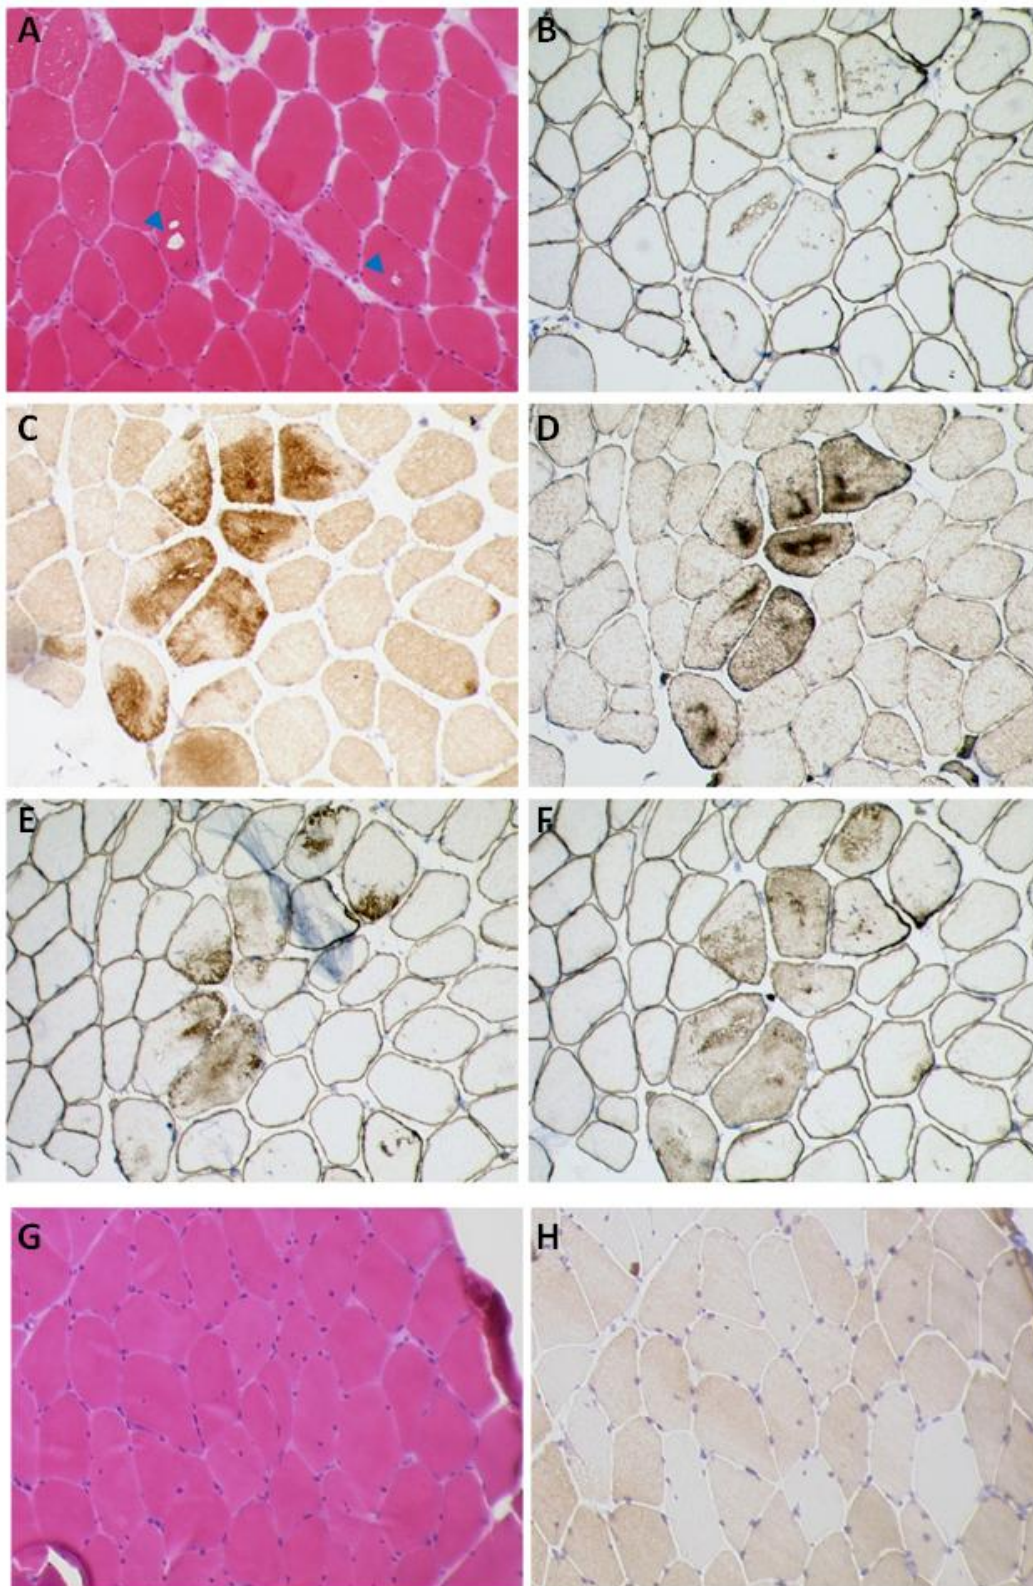

Histological and Immunohistochemical findings for patients F.4A (A-F) and F.4B (G, H). A, G: H&E staining. Immunolabelling for spectrin (B), Myotilin (C,H), Desmin (D), delta-sarcoglycan (E), and dystrophin C-terminal (F). Note the presence rimmed vacuoles (arrow head) and intracytoplasmic aggregates on labelling for delta-sarcoglycan and dystrophin in patient F.4A, and absence of major histopathological changes or protein aggregation in patient F.4B.

## **Supplemental Methods**

### **Software and Scripts used.**

The 100 genomes data was downloaded between positions 178404570 and 179734924 using **tabix** which is part of the **samtools** package ([samtools.sourceforge.net](http://samtools.sourceforge.net)). This was then converted to the IMPUTE format for phased data by **vcftools** ([vcftools.sourceforge.net](http://vcftools.sourceforge.net)). Filtering this data by only including positions shared with our assays was performed using a custom written **python** script, and then the data was prepared for the programs **PHASE** ([stephenslab.uchicago.edu/software.html](http://stephenslab.uchicago.edu/software.html)) and **haploview** ([www.broad.mit.edu/mpg/haploview/](http://www.broad.mit.edu/mpg/haploview/)) using **R** scripts, selecting only those individuals from the CEU and GB populations that did not have parents in the data set, and by adding homozygote wild type alleles at the disease position for 1000 genomes data.

Sample information was obtained from the file [phase1\\_samples\\_integrated\\_20101123.ped](#) downloaded from the 1000 genomes data repository.

**PHASE** was used to phase haplotypes, using the known haplotypes option to use the 1000 genomes data as known phase data. The pairs output file was used to determine the relative posterior probability of the different haplotype reconstructions for these data. The statistical programming environment **R** was used for post processing of **PHASE** pairs output. The **haploview** program was used to investigate the haplotype structure of the population data and to produce plots.

A script containing the commands used for **tabix**, and **vcftools** and **R** and **python** scripts are available from <http://www.staff.ncl.ac.uk/i.j.wilson/sharedhaplotypes>.
